# Supplementary material for: Light harvesting and energy transfer in a ruthenium–coumarin-2 copolymer
Source: Royal Society of Chemistry journal article supplement (doi:10.1039/b103792g), 2001-01-01
Supplement: b103792g.doc [file b103792g.doc]

# Light Harvesting and Energy Transfer in a Ruthenium / Coumarin-2 Copolymer

Xavier Schultze, Jason Serin, Alex Adronov and Jean M. J. Fréchet*

*University of California, Berkeley, CA 94720-1460*

**Supporting information**

General. THF was dried over Na / benzoquinone before use. All the other solvents were anhydrous and reagent grade. Absorption spectra were recorded on a Cary 50 UV-vis spectrometer in chloroform. Fluorescence emission and excitation spectra were obtained using an ISA/SPEX Fluorolog 3.22 equipped with a 450W Xe lamp, double excitation and double emission monochromators and a digital photon-counting photomultiplier. Samples for fluorescence experiments were dissolved in chloroform in standard 1 cm quartz cells. The optical density was kept below 0.1 and the samples were degassed by bubbling argon for 5 minutes before each measurement. All measurements were performed at room temperature. The composition of the polymers was determined by elemental analysis and by UV-Vis spectroscopy using the extinction coefficients of monomers 5 (ε = 15000 M-1.cm-1 at 350nm) and 4 (ε =14000 M-1.cm-1 at 465nm) to determine the relative concentrations of each monomer within the copolymers. Molecular weight of copolymer 3 was determined by GPC in DMF.

**Synthesis of 4-methyl-4’-methoxyethyl-2,2’-bipyridine:**

Butyl lithium (2.5 mL of a 2.3 M sol. in hexane, 5.7 mmol) was added to 0.8 ml of distilled diisopropylamine in 10 mL of dry THF under argon at 0C. After 30 min, 1 g of 4,4’ dimethylbipyridine (5.43 mmol) in 20 mL of dry THF was transferred by canula to the above solution at 0C, resulting in a dark brown mixture. After 2 hours at 0C, chloromethylmethyl ether (1 mL, 13.2 mmol) in 10 mL of dry THF was added and the yellow solution was allowed to warm to room temperature. After one hour of stirring, 10 mL of a saturated NaHCO3 solution was then added to quench the excess chloromethylmethylether. This mixture was extracted twice with 200 mL of dichloromethane. The organic phase was dried over MgSO4, concentrated and further purified by passing through a passivated SiO2 plug, which was eluted with dichloromethane. This yielded 0.97 g of a yellow oil (80%). 1H NMR (400 MHz, CDCl3):  = 2.15 (s, 3H), 2.73 (t, 2H; J=2Hz), 3.13 (s, 3H), 3.46 (t, 2H; J=2Hz), 6.9 (s, 1H), 7 (d, 2H; J=4Hz), 8 (d, 2H; J=2.5Hz), 8.35 (d, 2H; J=2.5Hz). 13C NMR (400 MHz, CDCl3):  = 20.75, 35.28, 58.27, 71.76, 121.18, 121.63, 123.97, 124.29, 147.69, 148.49, 148.63, 148.82, 155.48, 155.73.

# Synthesis of 4-methyl- 4’-bromoethyl-2,2’-bipyridine:

500 mg of 4-methyl-4’-methoxyethyl-2,2’-bipyridine (2.19 mmol) were refluxed overnight in 20mL of HBr (48% sol. in H2O) to give a black solution which was neutralized by careful addition of saturated NaHCO3. This mixture was then extracted with dichloromethane, dried over MgSO4 and concentrated to give 580 mg of a purple, viscous oil (yield: 96%). 1H NMR (400 MHz, CDCl3):  = 2.19 (s, 3H), 3 (t, 2H; J=2.5Hz), 3.45 (t, 2H; J=2.5Hz), 6.9 (d, 2H; J=1.6Hz), 8 (d, 2H; J=1.6Hz), 8.35 (d, 2H; J=3.2Hz). 13C NMR (400 MHz, CDCl3):  = 20.91, 30.09, 38.17, 120.9, 121.74, 123.64, 124.57, 147.89, 148.23, 148.63, 148.98, 155.28, 156.11.

**Synthesis of 4-methyl-4’-vinyl-2,2’ bipyridine:**

500 mg of 4-methyl-4’-bromoethyl-2,2’-bipyridine (1.8 mmol), 2.5g of K2CO3 (18 mmol) and 95 mg of 18-crown-6 (0.36 mmol) were suspended in 15 mL of acetone and refluxed overnight. The reaction mixture was then concentrated and passed through a passivated (hexanes:Et3N = 9:1) SiO2 plug that was eluted with dichloromethane. The compound was further purified by precipitation in water from an acetone solution to give 276 mg of a white powder (yield: 78%). 1H NMR (400 MHz, CDCl3):  = 2.44 (s, 3H), 5.5 (d, 1H; J=1.6Hz), 6.1 (d, 1H; J=2.4Hz), 6.75 (q, 1H; J=4.8Hz), 7.14 (t, 1H; J=1Hz), 7,3 (t, 1H; J=1Hz), 8.23 (s, 1H), 8.39 (s, 1H), 8.54 (d, 1H; J=1Hz), 8.62 (d, 1H; J=1Hz). 13C NMR (400 MHz, CDCl3):  = 21.08, 118.38, 118.71, 120.49, 121.93, 124.54, 134.87, 145.72, 148.07, 148.85, 149.32, 155.73, 156.6.

**Synthesis of the RuVibipy monomer :**

300 mg of Ru(BipyMe2)Cl2 (555 mol) and 109 mg of 4-methyl, 4’-vinyl,2,2’ bipyridine (555 mol) were refluxed overnight in 5 mL of MeOH in the dark under argon. The deep red solution was concentrated and redissolved in 10 mL of water. 20mL of a saturated aqueous solution of KPF6 was added which caused the precipitation of an orange-red solid. This solid was filtered, washed with water and dissolved in acetone. A fine orange solid was obtained by precipitation in Et2O (yield: 95%). 1H NMR (400 MHz, acetone-d6):  = 2.55 (s, 15H), 5.7 (d, 1H; J=1.6Hz), 6.35 (d, 1H; J=1.6Hz), 6.9 (q, 1H; J=3.2Hz), 7.38 (s, 4H), 7.57 (s, 2H), 7.81 (s, 4H), 7.91 (s, 2H), 8.65 (s, 4H), 8.84 (s, 2H). 13C NMR (400 MHz, acetone-d6):  = 21.06, 121.75, 122.02, 125.01, 125.79, 129.29, 134.2, 150.83, 150.95, 151.57, 152.51, 157.50, 157.69.

**Polymerization :**

a) Coumarin 2 monomer (**5**) with 4-vinyl-4’-methylbipyridine (**6**):

170 mg of the coumarin-2 monomer (**5**) (510mol), 34 mg of 4-vinyl-4’-methylbipyridine (**6**) (170mol) and AIBN (0.2ml of a 3.10-2 solution in chlorobenzene) were placed in a 2 mL flask. The solution was degassed (freeze-thawed) twice, purged with argon and heated at 90C for 14 hours. The solution was then precipitated twice in 20 mL of Et2O, filtered and washed with 100 mL of MeOH giving 140mg of a white powder (Yield : 70%). Mw : 15400 da; PDI : 1.6

1H NMR (400 MHz, CDCl3):  = 8.35; 8.1; 7.7; 7; 6.8; 6.4; 6.1; 3.9; 2.8; 2.3; 1.6; 0.9.

Elemental analysis : N = 5.68%

b) Coumarin 2 monomer (**5**) with Ruthenium complex (**4**):

In a typical procedure, 20 mg of the coumarin-2 monomer (**5**) (60mol), 19.1 mg of the RuVibipy monomer (**4**) (20mol) and AIBN (0.2ml of a 4.10-3 solution in DMF) were placed in a 5 mL flask. The solution was degassed (freeze-thawed) twice and purged with argon. The polymerization was performed at 90C over 14 hours, after which the solution was precipitated twice in 20 mL of Et2O, filtered and washed with 100 mL of MeOH. The solid was stirred overnight in MeOH and filtered to give 26 mg of an orange solid (yield: 66%). Attempts to characterize the molecular weight of the polymer by GPC in DMF and by MALDI-TOF spectroscopy were unsuccessful.

1H NMR (400 MHz, CDCl3):  = 8.5; 7.8; 7.6; 6.8; 6; 4.1; 2.9; 2.6;2.3;2;0.9.
